# Supplementary material for: Women’s Experiences of Management of Urinary Tract Infections using Complementary and Alternative Medications and Expectations for the Future: A Qualitative Study
Source: Research Square preprint supplement (doi:10.21203/rs.3.rs-7573474/v1), 2025-11-28
Supplement: Supplementary file 1 [file 002188863a52ebee1a2b76a8.docx]

**Tables**

**Table 1. Themes identified**

| 1. **Knowledge of CAMs and Nature of Self-management of UTI**  - Range of products tried - Source of CAMs - information and products - Sources of reassurance  1. **Justifications for CAM use**  - Ideas about causes of recurrent UTIs - Concerns about antibiotics - Rationale for use - Perceived effectiveness for UTI prevention - Perceived effectiveness for self-management of presumed UTIs - Future plans  1. **Challenges with use of CAMS**  - Issues with use of CAMs- dosage and conflicting advice - Perceived adverse effects  1. **Expectations for future UTI management**  - Better testing - HCPs being educated - Further research - Testing for embedded UTIs |
| --- |

**Table 2: Additional products tried by women in the Social Media group (SM)**

| - Drinking teas such as green, nettle, turmeric, peppermint - Herbal drinks like lemon water, celery juice, apple cider vinegar, barley water, bicarbonate of soda - Dietary additions such as olive oil, Himalayan salt, ginger, garlic, celery, lemons, castor oil, “better fish oils” prescribed by the nutritionist - Intake of specific food to modify the pH of the diet, e.g., intake of an alkaline diet - Intake of green vegetables, berries like bearberries (uva ursi) and green pickles - Avoiding carbohydrates, sugar and diary - Using probiotics like drinking regular yoghurt, kefir yogurt, sauerkraut, using Lactobacillus Reuteri, Lactobacillus Rhamnosus, Fem-Dophilus - D-mannose - Methenamine Hippurate - Chinese Herbal Medicines - Antimicrobial medications which women defined as a “natural antibiotic” - Specific herbs prescribed by Herbologists - Intake of supplements like:   - Selenium  - Glutathione  - Witch Hazel  - An alkalinizing agent called Terranova Green pH alkaline (stated online as being highly alkaline-forming freeze dried botanicals and superfoods)  - Vitamin C  - Pure Synergy Bone Renewal (stated online as containing plant-Based Calcium with Natural Magnesium, Vitamin D3 and Vitamin K2)  - Colloidal silver  - Alloy drinks  - Biofilm disruptors like N-Acetyl-L-Cysteine (NAC) from private pharmaceutical companies  - Nutritional supplements to aid their digestion and help their gut |
| --- |
