# Supplementary material for: Women’s Experiences of Management of Urinary Tract Infections using Complementary and Alternative Medications and Expectations for the Future: A Qualitative Study
Source: Research Square preprint supplement (doi:10.21203/rs.3.rs-7573474/v1), 2025-11-28
Supplement: Supplementary file 2 [file 653174f8374e2402fb5a2474.docx]

**Supplementary Tables**

**Supplementary Table 1: Semi-structured interview**

“Thank you for the help you have already given us with the first phase of the NUTURE study by completing our questionnaire. To provide us with further information we want to speak to women from different settings (at the hospital, GP practice and via social media). This is to get a more personal view on Urinary Tract Infections (UTIs) and any experiences of using Complementary and Alternative Medicine products. Many of the questions will be like those on the questionnaire but by speaking to you we can explore and understand your experience further.”

### Interview Structure:

### The interview will be arranged at a convenient time for the participant. It will be a telephone interview however a face-face interview or video call can also be arranged it the participant prefers it.

There will be 3 parts to the interview:

1. Introduction by the researcher
2. Participant Questions: as per Question Schedule
3. Closing statements by the researcher

### Introduction

Prior to the semi-structured interview, the researcher will confirm with the participant that they:

1. Understand the purpose of the research,

Understand that their identity will be protected and that their anonymised direct quotes may be used and published

1. Are willing to be audio-recorded
2. Are aware that they can stop the interview whenever they wish, and no explanation will be required
3. Are willing to proceed with the interview and confirm it is their signature on the Consent Form

At the end of the introduction thank the person for agreeing to take part and assure them that their views are important to us and that they should feel free to be frank about the things they tell us and that we will assure their anonymity. Explain that the interview recording will be removed from the recording device as soon as possible, stored securely until it is transcribed, and the recording is then deleted. When the interview is typed up, all identifying information will be removed.

The questions in this schedule below are prompts to allow the researcher to broadly cover the same themes with each participant, but the questions do not need to be rigidly adhered to. Some questions may not be applicable, the researcher may need adjust the order and omit questions that may already have been addressed in previous replies or explore some topics further. The aim is to cover all the themes during the interview, but the style, order of the discussion and time spent on each one will be participant led.

If a participant becomes tired or indicates they wish to end the interview, then the remaining questions will not be asked. If the participant would like to continue with the interview at a later date when this is offered, either via phone, face to face or Skype, then this should be arranged at a mutually convenient time.

If a person chooses not to answer a question or is reluctant to answer a question or provide more detail, then they will not be pressed to do so. They are reassured that this is fine and that they do not need to answer questions if they are uncomfortable doing so.

###

**Question Schedule:**

The questions below will be used as prompts to generate discussion with the participant, covering different themes to explore with participants. The points added below each question are aspects of each theme that will be covered in the subsequent discussion.

**Participant Experience of Urinary Tract Infections (UTIs)**

1. Do you get any UTIs?
   - How often do you get them?
   - How long have you had it for
2. What symptoms do you get and how does it affect you ?
   - impact on life, work, activities of daily living
   - financial loss
   - Relationships with others and intimacy
   - How does it make you make you feel? Or your family feel?
3. How does the UTI get better?
   - home remedies
   - seeking medical advice / review
   - medication: antibiotics

**Participant Experience of Using Complementary and Alternative Medicine products**

1. Can you tell me about any home remedies, or Complementary and Alternative Medicine treatments you have tried for UTI’s?
   - How did you find out about them?
2. What made you decide to try these products, or not try them?
3. Can you tell me how you got your supplies?
   - Shop/ online?
4. How did you decide what dose/ how to take them?
   - instructions easily understandable,
   - advice from health care provider/ shop assistant?
5. Did they work as you had thought or hoped they would?
   - side effects,
   - helped with infection and symptoms
   - stopped further infections
   - did they like taking them
   - Did you have any concerns using the product?
   - Did you speak to anyone about them?

**Support using Complementary and Alternative Medicine products**

1. Can you tell me about any advice or support you got from a health care professional about using this?
   - Did you receive any or not?
   - Did the advice meet needs or not?
   - have you discussed them with GP/nurse/ hospital doctor/ specialist?
2. Thinking back to when you first started to use these products, is there anything else you could have been told about that would have been helpful?
3. Are you still using the products, or would you use them again?

- Would you be happy to use this/these in the long term?
- why or why not
- what would help

anyone else in family?

**Closing Statements:**

At the end of the interview the researcher will:

- Thank the participant once again for their time and valuable contribution to the project
- Check if they want to be informed about the results of the study (via email or post)
- Confirm they are happy with the discussion and for the research team to use anonymised information obtained from the interview
- Confirm they are happy for anonymised quotes to be used
- Confirm they have researchers contact details should they have any further questions

**Supplementary Table 2: Quotes of women self-managing with CAMS**

| **Range of Products Tried**  “have heard a lot of folk say if you have got a urine infection or a kidney infection that cranberry juice is good for it” [GP:1]  “I think my mother told me. I think it was an old-fashioned remedy (Barley water). Everybody bought the propriety brand - Robinson’s. My mother and my aunt all used it. My friends all spoke about it. So, it was word of mouth.” [GG:4]  “Before I was like educated in UTIs, I believed the myth about cranberry. (laughter) I definitely used to take.. I used to drink cranberry juice a lot. I tried cranberry pills. I tried, I think it's citric acid, I can't remember. I've gone through a lot of trying to even make my urine more alkaline and more acid to see if that would help.” [SM:4]  “That was my first. Putting yogurt down below. I’ve done all that. Yeah, that was on my first before I knew what I had. I used to do that when I had the urine infections. Put yogurt down there (laughter).”  [GG:6]  **Source of CAMs - information and products**  “really just word of mouth. Really just people saying.. like I would say to my mum or my sister that I think I have a urine infection and they would say well I have heard.. heard through the Grapevine that cranberry juice is meant to help” [UG:1]  “I really don’t know how I found out about cranberry juice. Possibly reading about it. Because of desperation, I think it's called.” [GP:3]  “Doctors are not good at telling people all the options for treatments apart from antibiotics. You are told to take a tablet and that’s the business. It doesn’t work that way.” [GG:1]  “Doctor wasn’t particularly concerned but you have got to the stage of being in front of the doctor, they probably know you are after an antibiotic at that point. If you have tried everything else” [UG:3]  “I believe doctors should lead you into a direction that you want to be in. Like if I asked for natural help and none of them could give me the answers and no one would direct me to the proper doctor to do so” [SM:3]  “The best thing the GP ever did for me was referring me to (retracted) and the only way I knew to ask to be referred to urogynaecology was because I knew (a doctor in Urogynaecology). It was through knowing him and telling him about these recurrent UTIs that he was like, there is stuff they can do- you just have to be referred to the right people. I am so lucky to know him. Most people don’t know someone with this specialism. If I had not known him.. I had to literally go to my GP and say I want to be referred to urogynaecology and I had never been suggested to me that I could do that. They never said that this could be a course of action. It was always just take antibiotics and you will get better.” [SM:4]  **Sources of Reassurance**  “haven't tried any home remedies for UTIs but it something like I've always been quite keen on trying and I've spoken like with my GP. She kind of hinted things like that as well. But it is just knowing what the right thing is to try” [GP:2]  “(Cranberry juice) is a drink.. I can drink.. so.  It does not bother me” [GP:1]  “I wouldn't think too much of it. I would certainly try another glass” [GP:6] |
| --- |

**Supplementary Table 3: Quotes of women providing justifications for use of CAMs**

| **Ideas about Causes for Recurrent UTIs**  “I have had one the same one for four years. OK so it’s the same one. It's embedded. The bacteria are embedded in the bladder wall. Antibiotics will kill free floating bacteria, but they won't kill the bacteria that are embedded, which will always come back.” [SM:2]  **Concerns about Antibiotics**  “I really try and believe in like a holistic approach to health. And I didn’t want to rely on antibiotics forever.  And I don't like that they stripped my stomach of all those good bacteria. I was getting quite a lot of colds and I was wondered if that was because I was taking antibiotics a lot of the time. Primarily, actually, it's because I have a real fear of becoming.. nitrofurantoin stopping working. So, I really want it to be like the final line of defence when I've done everything else right. [SM:4]  “I took Doxycycline and Nitrofurantoin under the embedded UTI specialist (Dr Removed). Doxycycline has very bad kidney pain. So, I stopped it and went up back onto nitrofurantoin, which I'd taken before, but been shorter doses. I was on it for three weeks. By the end of that I had diarrhoea and blood coming out of me, and after that I developed very bad gut pain which I've been fighting to improve gradually. Nitrofurantoin gives me neuropathy, bad gut problems. So, for 7 days, I took nitrofurantoin. But I got neuropathy. I got no feeling in one foot and my toes swelled up.” [SM:2]  “when I take too many antibiotics my immune system seems to be kind of rundown. Then you end up picking up other things like thrush and different things. From the antibiotics. It is just knowing what the right thing is to try (is)” [GP:2]  **Rationale for use**  “Worth a try cannot do any harm can it” [GP:1]  “I am a bit scared because before I had an abscess attached to my bowel and bladder. It was touch and go with me at that point. There was a major operation I got. That's why I'm on the antibiotic for life. I'm scared that the urine infection starts to go into like an abscess. I worry about it all of the time” [GP:1]  “I'm conscious about antibiotics becoming difficult because they don't work in the same way as they did in the past.” [UG:4]  “Women are always open to these ideas. If you have anecdotal evidence that it works people are inclined to try it as well. Most of these drugs are harmless. I wasn’t asking anybody to take prescribed drugs that were for somebody else. It was just an old-fashioned home remedy” [GG:4]  **Perceived Effectiveness for UTI Prevention**  “tried cranberry juice because I had heard about it. I used to work in a nursing home as a carer and we used to give (care) home residents cranberry juice every morning to try and stop them from getting urine infections. One part of the fridge full of cranberry juice. I said how’s that and she said ‘we give it to all residents every day in the morning to hope to prevent urine infections’” [GP:6]  Women didn’t seem to have any problems with sachets containing cranberry or oral cranberry supplements. “didn’t really know what dose to take. I kind of just went on what they had on the shelf but it would have been a bit better to be better informed about it.” [GP:2]  **Perceived Effectiveness for Self-management of Presumed UTIs**  “quite desperate for anything to help, which would not damage your kidneys” [SM:3]  **Future plans**  “You have to do your own research. The man who worked in the supplement Department. He knew a lot, but not enough for women's issues.” [SM:3] |
| --- |

**Supplementary Table 4: Quotes of women discussing challenges with use of CAMS**

| **Issues with use of CAMs- dosage and conflicting advice**  “didn’t even ask how much to take. I didn’t really think you needed to. I would not expect for instructions to be on box of cranberry juice for urine infections.” [GP:1]  “The cranberry tablets tell you. I think it was 3 a day but I took one in the morning and one at night because I kept forgetting the one in between.  The yogurts I just take 3 tablespoons of it into oats as a breakfast type thing. I just thought that 3 tablespoons- just add some milk. Just the consistency because I weighed out 30 grams of oats. It’s almost sort of dietary thing so I was just trying to mix it up to that amount sort of thing.  ” [SM:1]  “(Probiotics) I read what was on the bottle and then also from my Facebook support group. We often share what we're taking on there and other people have shared what their regime is. I guess I do a lot of reading up and I'm in different groups and I kind of compare and contrast. I take try to take everything with a pinch of salt because I know that everybody is different. So, I just, with everything, I just kind of think. Especially because it is probiotics it's not as a huge school of thought that probiotics don't do anything, so I'm not worried by like experimenting with probiotics because I know that's pretty hard work. So, I was kind of happy to try them and see  how it went.”  [SM:4]  “Sometimes you know you are getting different instructions. But when you are that desperate that you are hurting, I think you try everything” [GG:6]  **Perceived Adverse Effects**  “Possible damage that it [CAM therapy] will do to my guts and maybe my liver” [SM:2]  “I don’t think I took enough of it to have side effects” [GG:3] |
| --- |

**Supplementary Table 5: Quotes of women discussing expectations for future UTI management**

| **Better testing**  “That urine test goes back to the 1950s and it should be revised. Dipsticks can be very inaccurate but the actual test itself doesn't always get sent for culture. When the bacteria are free floating then the urine test may show it, and if you read on the forums you'll see, especially the embedded UTI forum. So, it could be in my case it was because the bacteria was embedded in the bladder wall, or it could be because the white blood cell count wasn't over a certain level” (SM:2)  **HCPs being educated**  I only ever saw GPs about UTIs when I was first aware of getting UTI, when I was 19. Then I would say it took me till I was about maybe 30 when I was just get an infection. See the GP. They would give me antibiotics. I would take them for about 2 weeks and then I kind of go through that process again. It took me till I was about 30 to be like there's got to be a better way than this. I don't want this to be my life forever. I really want investigation to try and work out the cause and a long-term treatment plan.” (SM:4)  **Further Research**  “I belong to investigation of chronic urinary tract infections forum before. There's a microbiologist on that that has tried everything. She's a patient. She's tried phage therapy for a whole year. It worked for the year when she stopped the infection came back, but she thought maybe if she had got custom-made phages it would work, but I think after a year of paying for that, so thousands of euros she sort of gave up, you know? Yeah, there's another lady on that forum who says that in her country, because she from Belgium, she's heard a lot of success stories.... There is research in San Diego going on into phage therapy. It might be the way of the future for all these. Anything that's resisting antibiotics now. It could be phages could be the answer. Bring phage therapy to the UK! Yes, phage therapy. That’s what I’m really advocating. ” (SM:2)  **Testing for embedded UTIs**  “The thing is I suspect that I have an embedded UTI. Have you  heard about the MicroGenDX test? It seems like it's used a lot more in the US. so on the support groups, lots of women in the US get these called MicroGenDx. It's a very like deep test on your urine culture and then it identifies exactly what bacteria is causing your UTI. So then you can be on like a very specific course of antibiotics and a lot of women on my support groups had a lot of success with it.” (SM:4)t |
| --- |
